# Supplementary material
Source: PubMed Central journal article supplement (PMC7497566)
Supplement: emermed-2020-209744supp001.pdf [file emermed-2020-209744supp001.pdf]

#### Abstract in Italian

‘Riportiamo la nostra esperienza di pronazione in pazienti trattati con casco per ventilazione non invasiva con pressione continua positiva per insufficienza respiratoria acuta severa dovuta a polmonite interstiziale da COVID-19. I risultati preliminari evidenziano un netto miglioramento della  $PaO_2$  e del rapporto  $PaO_2/FiO_2$  dopo un’ora di ventilazione non invasiva in pronazione. Non abbiamo notato nessuna modifica invece del pattern ecografico polmonare prima e dopo la ventilazione in pronazione. Al momento della scrittura di questo articolo, abbiamo tentato la pronazione in 10 pazienti. Il tentativo è fallito per 4 di questi 10 pazienti per mancanza di collaborazione, scarso controllo del dolore o rifiuto da parte del paziente al trattamento.’

**This abstract has been translated and adapted from the original English-language content. Translated content is provided on an "as is" basis. Translation accuracy or reliability is not guaranteed or implied. BMJ is not responsible for any errors and omissions arising from translation to the fullest extent permitted by law, BMJ shall not incur any liability, including without limitation, liability for damages, arising from the translated text.**
